# Supplementary material for: Isotemporal Substitution Analysis of Accelerometer-Derived Sedentary Behavior and Physical Activity on Cardiometabolic Health in Korean Adults: A Population-Based Cross-Sectional Study
Source: MDPI journal article supplement (doi:10.3390/ijerph182111102), 2021-10-22
Supplement: s1 [file s1]

## Supplementary Materials

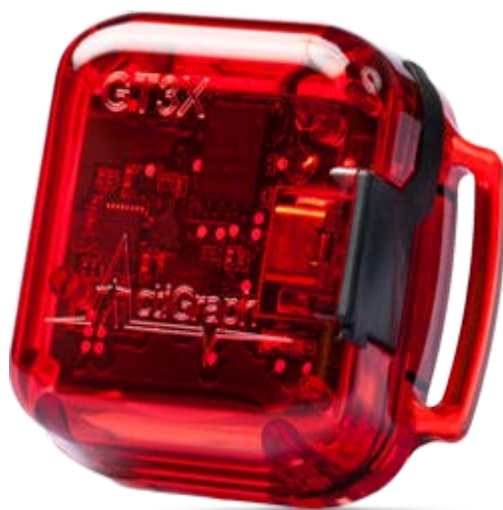

**Figure S1.** ActiGraph GT3X (LLC, Fort Walton Beach, FL, USA) <https://actigraphcorp.com/support/activity-monitors/gt3x/>

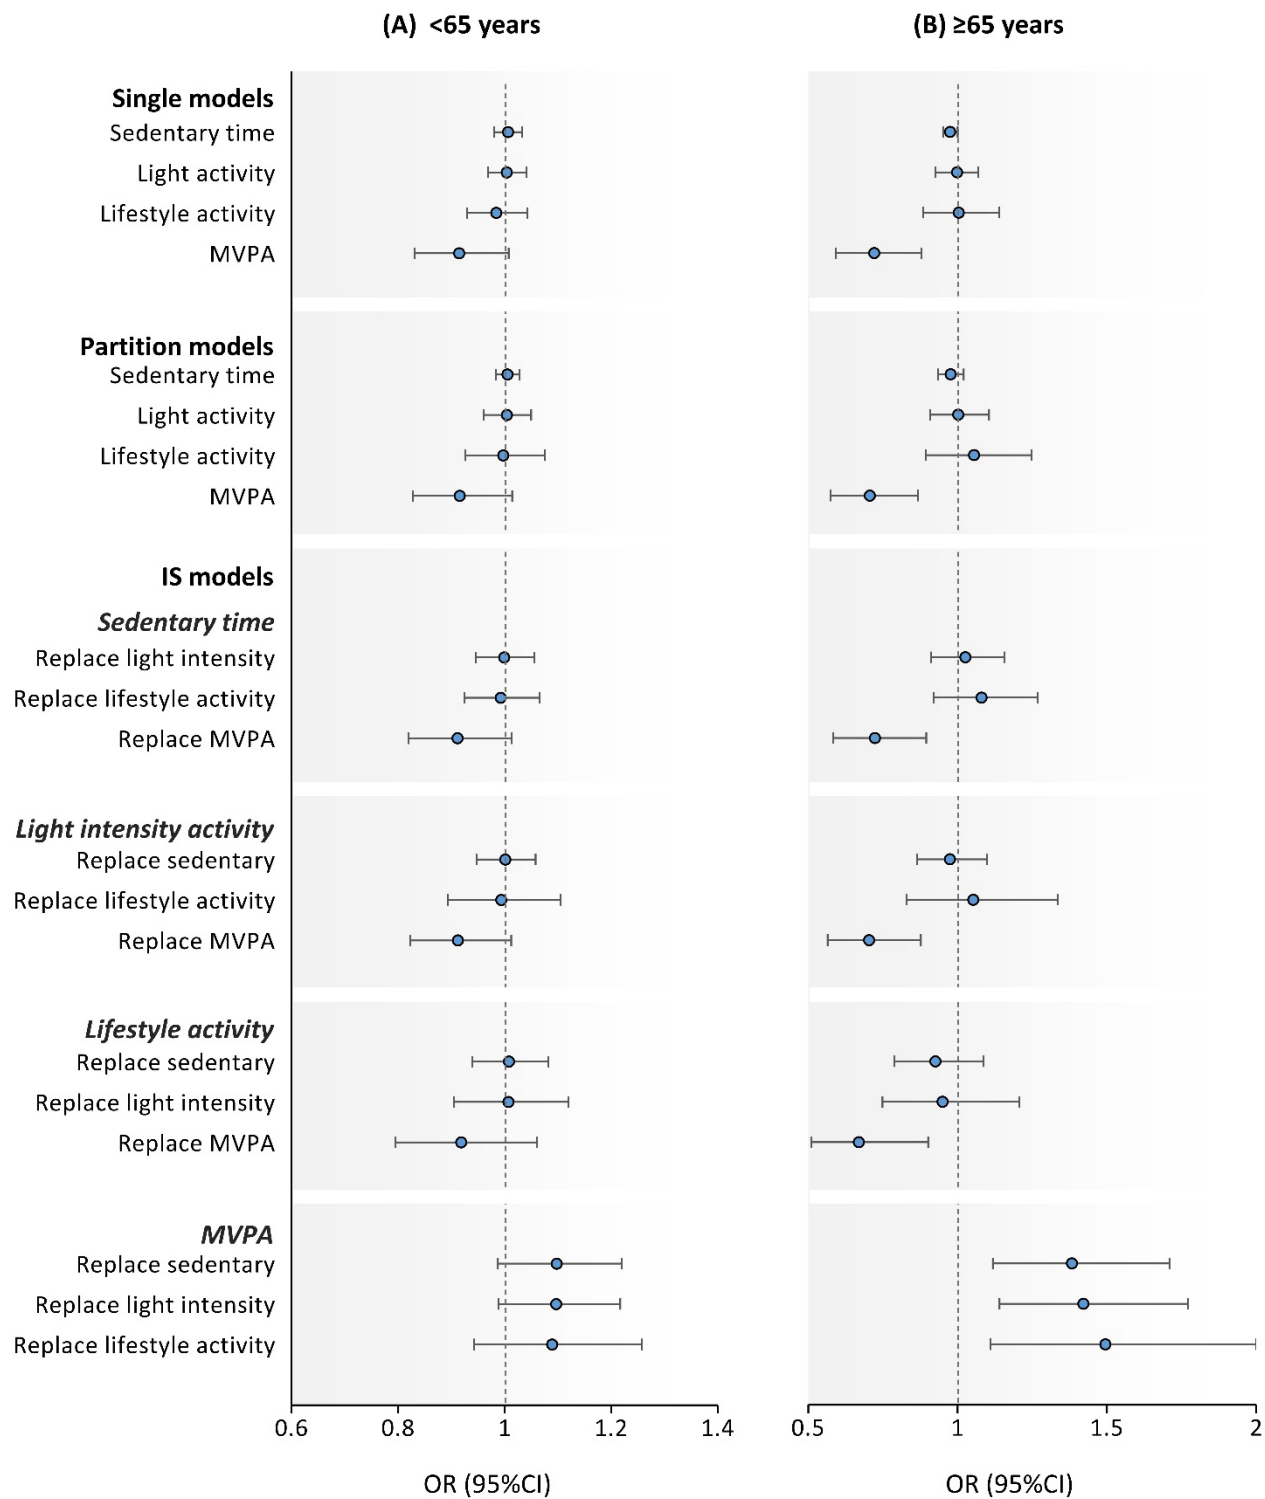

**Figure S2.** Single factor, partition, and isothermal substitution models examining the association of sedentary behavior, light and lifestyle, and MVPA with adverse cardiometabolic health ( $\geq 3$  risk factors) by age group

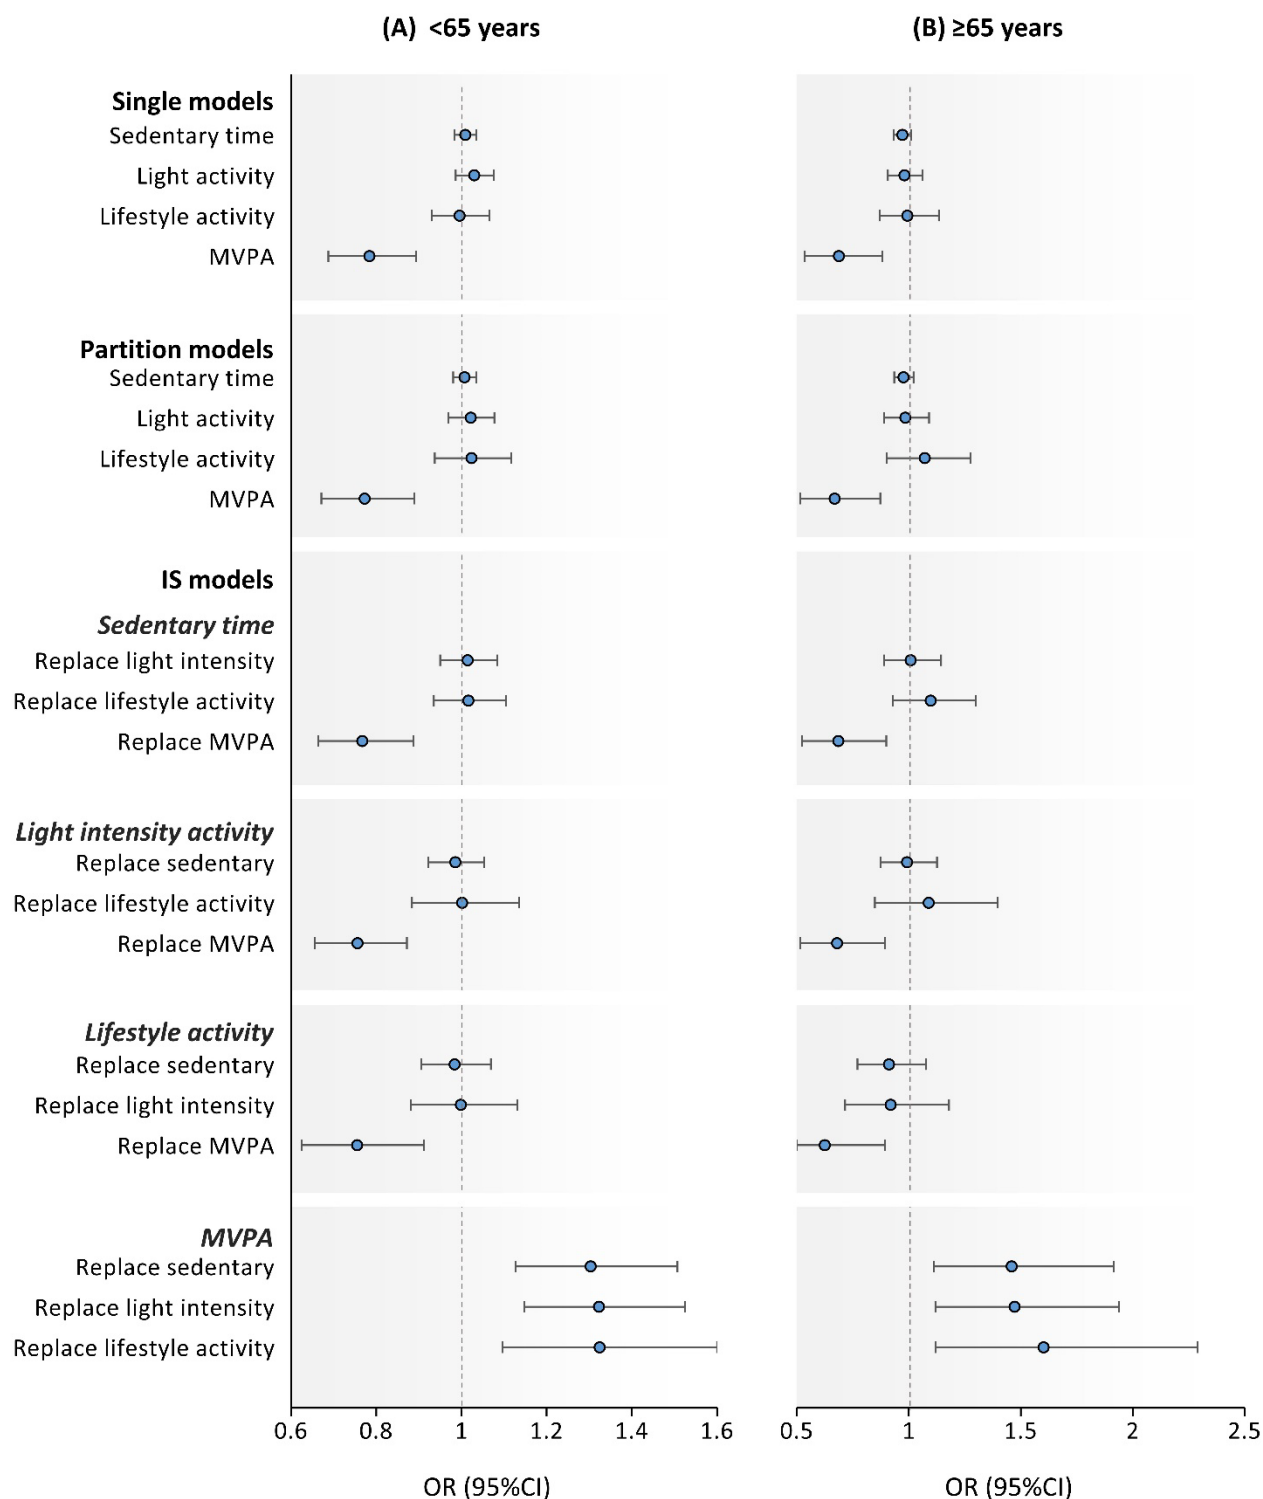

**Figure S3.** Single factor, partition, and isothermal substitution models examining the association of sedentary behavior, light and lifestyle, and MVPA with adverse cardiometabolic health ( $\geq 4$  risk factors) by age group
